# Supplementary material for: Development and Evaluation of a HS-SPME GC-MS Method for Determining the Retention of Volatile Phenols by Cyclodextrin in Model Wine
Source: Molecules. 2019 Sep 21;24(19):3432. doi: 10.3390/molecules24193432 (PMC6803902; doi:10.3390/molecules24193432)
Supplement: Supplementary file 1 [file molecules-24-03432-s001.pdf]

## Supplementary Materials

# Development and Evaluation of a Novel SPME GC-MS Method for Determining the Retention of Volatile Phenols by Cyclodextrin in Model Wine

Chao Dang <sup>1,2</sup>, Kerry L. Wilkinson <sup>1,2,\*</sup>, Vladimir Jiranek <sup>1,2</sup> and Dennis K. Taylor <sup>1,2</sup>

<sup>1</sup> The University of Adelaide, School of Agriculture, Food and Wine, PMB 1, Glen Osmond, SA, 5064, Australia; chao.dang@adelaide.edu.au (C.D.), vladimir.jiranek@adelaide.edu.au (V.J.), dennis.taylor@adelaide.edu.au (D.K.T.)

<sup>2</sup> The Australian Research Council Training Centre for Innovative Wine Production, PMB 1, Glen Osmond, SA, 5064, Australia

\* Correspondence: kerry.wilkinson@adelaide.edu.au (K.L.W.); Tel.: +61-8-8313-7360

**Table S1.** Calibration curve using conventional HS-SPME GC-MS method.

|                | <b>Guaiacol</b> | <b>4-Methylguaiacol</b> | <b>4-Ethylguaiacol</b> |
|----------------|-----------------|-------------------------|------------------------|
| Slope          | 0.980           | 1.014                   | 1.328                  |
| Intercept      | 0.003           | 0.007                   | 0.006                  |
| R <sup>2</sup> | 0.9997          | 0.9996                  | 0.9996                 |

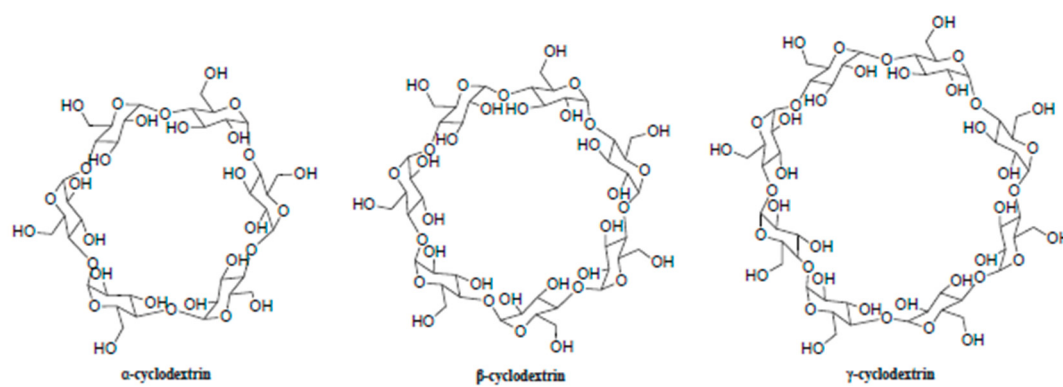

Figure S1. Structures of  $\alpha$ -CD,  $\beta$ -CD and  $\gamma$ -CD.

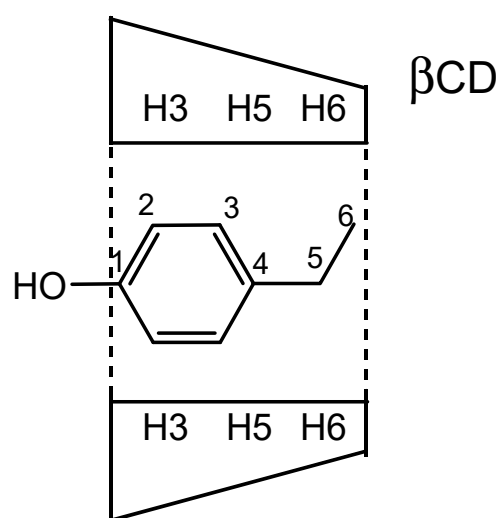

**Figure S2.** Encapsulation of 4-ethylphenol within  $\beta$ -CD.

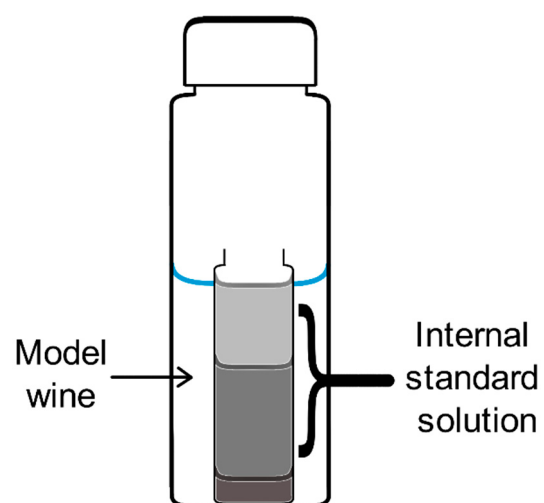

**Figure S3.** Diagram of headspace vial containing model wine sample, with different volumes of internal standard in the glass ampoule (as indicated by shading).
